# Supplementary material for: A Multilocus Species Delimitation Reveals a Striking Number of Species of Coralline Algae Forming Maerl in the OSPAR Maritime Area
Source: PubMed Central journal article supplement (PMC4128821; doi:10.1371/journal.pone.0104073), 2014-08-11
Supplement: pone.0104073.s002.pdf [file pone.0104073.s002.pdf]

**Table S2A. COI-5P sequence divergence within (diagonal) and between (below diagonal) the PSHs shown in Fig. 1.** The number of base substitutions per site from averaging over all sequence pairs between PSHs are shown. Analyses were conducted using the Kimura 2-parameter model [1]. In bold, values below an arbitrary 2% cutoff. n/c = not computable.

|              | PSH1         | PSH2  | PSH3  | PSH4         | PSH5  | PSH6         | PSH7         | PSH8         | PSH9  | PSH10 | PSH11        | PSH12        | PSH13        | PSH14 | PSH15 | PSH16 |
|--------------|--------------|-------|-------|--------------|-------|--------------|--------------|--------------|-------|-------|--------------|--------------|--------------|-------|-------|-------|
| <b>PSH1</b>  | <b>0.002</b> |       |       |              |       |              |              |              |       |       |              |              |              |       |       |       |
| <b>PSH2</b>  | 0.144        | n/c   |       |              |       |              |              |              |       |       |              |              |              |       |       |       |
| <b>PSH3</b>  | 0.141        | 0.041 | n/c   |              |       |              |              |              |       |       |              |              |              |       |       |       |
| <b>PSH4</b>  | 0.168        | 0.169 | 0.167 | n/c          |       |              |              |              |       |       |              |              |              |       |       |       |
| <b>PSH5</b>  | 0.168        | 0.171 | 0.169 | <b>0.011</b> | n/c   |              |              |              |       |       |              |              |              |       |       |       |
| <b>PSH6</b>  | 0.167        | 0.139 | 0.139 | 0.057        | 0.064 | n/c          |              |              |       |       |              |              |              |       |       |       |
| <b>PSH7</b>  | 0.166        | 0.141 | 0.141 | 0.056        | 0.063 | <b>0.002</b> | <b>0.002</b> |              |       |       |              |              |              |       |       |       |
| <b>PSH8</b>  | 0.173        | 0.154 | 0.156 | 0.114        | 0.117 | 0.123        | 0.122        | <b>0.002</b> |       |       |              |              |              |       |       |       |
| <b>PSH9</b>  | 0.168        | 0.153 | 0.155 | 0.109        | 0.113 | 0.118        | 0.118        | <b>0.005</b> | n/c   |       |              |              |              |       |       |       |
| <b>PSH10</b> | 0.185        | 0.154 | 0.145 | 0.158        | 0.167 | 0.145        | 0.144        | 0.157        | 0.156 | n/c   |              |              |              |       |       |       |
| <b>PSH11</b> | 0.179        | 0.141 | 0.141 | 0.147        | 0.156 | 0.138        | 0.141        | 0.145        | 0.145 | 0.028 | <b>0.003</b> |              |              |       |       |       |
| <b>PSH12</b> | 0.192        | 0.159 | 0.159 | 0.146        | 0.154 | 0.143        | 0.142        | 0.154        | 0.149 | 0.081 | 0.068        | <b>0.006</b> |              |       |       |       |
| <b>PSH13</b> | 0.156        | 0.160 | 0.153 | 0.151        | 0.157 | 0.142        | 0.141        | 0.165        | 0.158 | 0.135 | 0.133        | 0.137        | <b>0.004</b> |       |       |       |
| <b>PSH14</b> | 0.165        | 0.169 | 0.157 | 0.148        | 0.154 | 0.146        | 0.145        | 0.162        | 0.155 | 0.143 | 0.141        | 0.145        | 0.022        | n/c   |       |       |
| <b>PSH15</b> | 0.198        | 0.199 | 0.193 | 0.192        | 0.190 | 0.186        | 0.185        | 0.189        | 0.188 | 0.186 | 0.174        | 0.188        | 0.189        | 0.182 | n/c   |       |
| <b>PSH16</b> | 0.180        | 0.193 | 0.184 | 0.188        | 0.184 | 0.184        | 0.183        | 0.179        | 0.178 | 0.182 | 0.167        | 0.186        | 0.185        | 0.173 | 0.036 | n/c   |

**Table S2B. COI-5P sequence divergence within (diagonal) and between (below diagonal) the SSHs shown in Fig. 2.** The number of base substitutions per site from averaging over all sequence pairs between PSHs are shown. Analyses were conducted using the Kimura 2-parameter model [1]. In bold, values below an arbitrary 2% cutoff. n/c = not computable.

|               | SSH1         | SSH2  | SSH3  | SSH4+5       | SSH6+7       | SSH8+9       | SSH10 | SSH11        | SSH12        | SSH13        | SSH14 | SSH15 | SSH16 |
|---------------|--------------|-------|-------|--------------|--------------|--------------|-------|--------------|--------------|--------------|-------|-------|-------|
| <b>SSH1</b>   | <b>0.002</b> |       |       |              |              |              |       |              |              |              |       |       |       |
| <b>SSH2</b>   | 0.144        | n/c   |       |              |              |              |       |              |              |              |       |       |       |
| <b>SSH3</b>   | 0.141        | 0.041 | n/c   |              |              |              |       |              |              |              |       |       |       |
| <b>SSH4+5</b> | 0.168        | 0.170 | 0.168 | <b>0.011</b> |              |              |       |              |              |              |       |       |       |
| <b>SSH6+7</b> | 0.167        | 0.141 | 0.141 | 0.060        | <b>0.002</b> |              |       |              |              |              |       |       |       |
| <b>SSH8+9</b> | 0.171        | 0.154 | 0.156 | 0.114        | 0.121        | <b>0.004</b> |       |              |              |              |       |       |       |
| <b>SSH10</b>  | 0.185        | 0.154 | 0.145 | 0.162        | 0.144        | 0.157        | n/c   |              |              |              |       |       |       |
| <b>SSH11</b>  | 0.179        | 0.141 | 0.141 | 0.152        | 0.140        | 0.145        | 0.028 | <b>0.003</b> |              |              |       |       |       |
| <b>SSH12</b>  | 0.192        | 0.159 | 0.159 | 0.150        | 0.142        | 0.152        | 0.081 | 0.068        | <b>0.006</b> |              |       |       |       |
| <b>SSH13</b>  | 0.156        | 0.160 | 0.153 | 0.154        | 0.141        | 0.163        | 0.135 | 0.133        | 0.137        | <b>0.004</b> |       |       |       |
| <b>SSH14</b>  | 0.165        | 0.169 | 0.157 | 0.151        | 0.145        | 0.160        | 0.143 | 0.141        | 0.145        | 0.022        | n/c   |       |       |
| <b>SSH15</b>  | 0.198        | 0.199 | 0.193 | 0.191        | 0.185        | 0.188        | 0.186 | 0.174        | 0.188        | 0.189        | 0.182 | n/c   |       |
| <b>SSH16</b>  | 0.180        | 0.193 | 0.184 | 0.186        | 0.183        | 0.179        | 0.182 | 0.167        | 0.186        | 0.185        | 0.173 | 0.036 | n/c   |

[1] Kimura M (1980) A simple method for estimating evolutionary rates of base substitutions through comparative studies of nucleotide-sequences. J Mol Evol 16: 111-120.
