# Supplementary material for: A Multilocus Species Delimitation Reveals a Striking Number of Species of Coralline Algae Forming Maerl in the OSPAR Maritime Area
Source: PubMed Central journal article supplement (PMC4128821; doi:10.1371/journal.pone.0104073), 2014-08-11
Supplement: pone.0104073.s003.pdf [file pone.0104073.s003.pdf]

**Table S3. Matches with our sequences in public databases (Genbank: COI-5P and *psbA*; BOLD: COI-5P).** Only hits with an identity beyond a minimum threshold are reported for Genbank (98% for COI-5P, 99% for *psbA*) while BOLD's identification engine determines those queries that provide an acceptable match. Query coverage (i.e. overlap) always was >92%. BOLD searches were conducted against all barcode records lodged on BOLD in February 12<sup>th</sup>, 2013 (1,395,901 sequences); this unvalidated library includes records without species level identification, species represented by only one or two specimens, and species with interim taxonomy. Barcode Index Numbers (BIN) are clusters of similar sequences uploaded to BOLD that are likely to correspond to biological species.

| Query          | Genbank best hits |          |                               |           |                                                                                   | BOLD best hits             |            |                               |                                                                                                      |
|----------------|-------------------|----------|-------------------------------|-----------|-----------------------------------------------------------------------------------|----------------------------|------------|-------------------------------|------------------------------------------------------------------------------------------------------|
|                | Accession no.     | Identity | Taxonomy                      | Voucher   | Location                                                                          | BIN no. (no. collections)  | Identity   | Taxonomy                      | Location                                                                                             |
| <b>COI-5P</b>  |                   |          |                               |           |                                                                                   |                            |            |                               |                                                                                                      |
| SSH4+5 (Hap7)  | HM918812          | 99.2%    | <i>Lithothamnion glaciale</i> | GWS007542 | Canada (Newfoundland and Labrador, English Harbour Eastern Cove) (47.633N 54.87W) | BOLD:AAA6958 (39 collect.) | 98.9-99.9% | <i>Lithothamnion glaciale</i> | USA (Massachusetts, Maine); Canada (New Brunswick, Manitoba, Newfoundland and Labrador, Nova Scotia) |
| SSH4+5 (Hap24) | HM918812          | 98.8%    | <i>Lithothamnion glaciale</i> | GWS007542 | Canada (Newfoundland and Labrador, English Harbour Eastern Cove) (47.633N 54.87W) | BOLD:AAA6958 (39 collect.) | 98.6-99.2% | <i>Lithothamnion glaciale</i> | USA (Massachusetts, Maine); Canada (New Brunswick, Manitoba, Newfoundland and Labrador, Nova Scotia) |
| SSH6+7 (Hap5)  | No match          |          |                               |           |                                                                                   | BOLD:ABA9580 (2 collect.)  | 99.9%      | Corallinac sp.29BCcrust       | Canada (British Columbia)                                                                            |
| SSH6+7 (Hap17) | No match          |          |                               |           |                                                                                   | BOLD:ABA9580 (2 collect.)  | 100%       | Corallinac sp.29BCcrust       | Canada (British Columbia)                                                                            |
| SSH6+7 (Hap19) | No match          |          |                               |           |                                                                                   | BOLD:ABA9580 (2 collect.)  | 99.9%      | Corallinac sp.29BCcrust       | Canada (British Columbia)                                                                            |

| Query              | Genbank best hits |          |                               |                      |                                     | BOLD best hits            |          |          |          |
|--------------------|-------------------|----------|-------------------------------|----------------------|-------------------------------------|---------------------------|----------|----------|----------|
|                    | Accession no.     | Identity | Taxonomy                      | Voucher              | Location                            | BIN no. (no. collections) | Identity | Taxonomy | Location |
| SSH12 (Hap26)      | GQ917247          | 100%     | Uncultured<br>Corallinales    | LBC0001 <sup>a</sup> | France<br>(47.63905N<br>3.4166667W) | No match                  |          |          |          |
| SSH12 (Hap28)      | GQ917247          | 99.8%    | Uncultured<br>Corallinales    | LBC0001 <sup>a</sup> | France<br>(47.63905N<br>3.4166667W) | No match                  |          |          |          |
| SSH12 (Hap29)      | GQ917247          | 99.2%    | Uncultured<br>Corallinales    | LBC0001 <sup>a</sup> | France<br>(47.63905N<br>3.4166667W) | No match                  |          |          |          |
| SSH16 (Hap18)      | GQ917510          | 99.9%    | Uncultured<br>Corallinales    | LBC004               | France<br>(47.63905N<br>3.4166667W) | No match                  |          |          |          |
| <b><i>psbA</i></b> |                   |          |                               |                      |                                     |                           |          |          |          |
| SSH4+5 (91)        | JQ422235          | 99.8%    | <i>Lithothamnion glaciale</i> | GWS007542            | N/A                                 | N/A                       |          |          |          |
| SSH4+5 (1444)      | JQ422235          | 99.7%    | <i>Lithothamnion glaciale</i> | GWS007542            | N/A                                 | N/A                       |          |          |          |
| SSH 12 (47)        | GQ917708          | 100%     | Uncultured<br>Corallinales    | LBC0013              | France<br>(48.731937N<br>3.939152W) | N/A                       |          |          |          |

<sup>a</sup> Voucher LBC0001 has been subsequently assigned to *Phymatolithon* sp. by Bittner *et al.* (2011)
